# Supplementary material for: Public Preferences for Digital Therapies in Alzheimer's Disease Treatment: A Discrete Choice Experiment in China
Source: Research Square preprint supplement (doi:10.21203/rs.3.rs-6551380/v1), 2025-06-03
Supplement: Supplementary file 3 [file 527fc91029f38cdc77e41fa9.docx]

**Public Preferences for Digital Therapies in Alzheimer's Disease Treatment: A Discrete Choice Experiment in China**

**（Block4）**

Dear Respondent,

Thank you for taking the time to participate in our survey on preferences for digital therapy in Alzheimer’s disease. Alzheimer’s disease is increasingly becoming one of the most common age-related neurological conditions. With the rapid advancement of the internet, digital therapy has emerged as a promising approach. Digital therapy is an intervention driven by software programs and grounded in evidence-based medicine. It can be used independently or in combination with medications, medical devices, or other therapies to optimize patient care and improve health outcomes. Numerous clinical trials have demonstrated that digital therapy can have a positive impact on Alzheimer’s disease compared to traditional medical models.

The purpose of this study is to explore the preferences of Alzheimer’s disease patients for digital therapy, with the aim of providing valuable insights for researchers developing new digital therapies. This survey is completely anonymous, and we will ensure the strict confidentiality of all your information. The results will be used solely for academic research. You have the option to withdraw from the survey at any time. Please answer the questions as honestly as possible. Your input is crucial to the success of our research project. Thank you very much for your participation and contribution. If you have any questions, please feel free to contact the researcher at 13658082831.

China Pharmaceutical University

**Respondent's Signature：____________ Reviewer's Signature：____________**

**Survey Date：____________ Survey Location:____________**

**I.Basic Information**

1. What is your gender?

A. Male

B. Female

2.What is your age?

A. 35 years old and below

B. 35-55 years old

C. 55 years old and above

3. What is your educational level?

A. Junior high school and below

B. Senior high school

C. Associate degree / Bachelor's degree

D. Master's degree and above

4. What is your household monthly income?

A. 0-3000 yuan

B. 3001-6000 yuan

C. 6001-9000 yuan

D. 9001 yuan and above

5. Where is your household located?

A. Provincial capital city

B. Prefecture-level city

C. County-level city

D. Town or rural area

6. Your current place of residence is：

Province: __________

City: __________

7. Has any of your family members (within three generations) been diagnosed with Alzheimer's disease?

A. Yes

B. No

8. How would you rate your level of understanding of Alzheimer's disease?

A. Very unfamiliar

B. Somewhat unfamiliar

C. Neutral

D. Somewhat familiar

E. Very familiar

**II. Selection of Digital Therapy Programs for Alzheimer's Disease**

**1. The Attributes of Digital Therapeutics**

| **No** | **Attributes** | **Levels** | **Attribute description** |
| --- | --- | --- | --- |
| 1 | Medical devices | Mobile application(tablet、phone)  Computer(based-web)  Others(virtual reality、vrain-Machine Interface） | Which medical device is preferred for therapy |
| 2 | Operation steps | 3 steps or less  4~6 steps  7 steps or more | How many operation steps can be accepted during treatment(Quantify ease of use as an operational step) |
| 3 | Training methods | Conventional cognitive training  Neuromodulation technology  Sports training | Which training methods is preferred |
| 4 | Therapy locations | At home  At hospital | Which therapy location is preferred |
| 5 | Therapy  frequency | 2 times a week  4 times a week  6 times a week | Which therapy frequency is preferred |
| 6 | Therapy duration | 20 minutes or less  20~40 minutes  40~60 minutes  60 minutes or more | Which therapy duration is preferred |
| 7 | The monthly cost of treatment | ￥500  ￥2500  ￥12500 | What is the most  acceptable payment  for digital therapy per month |
| 8 | Monitoring locations | At home  At hospital | Which monitoring method is preferred |

1. **Example of Selection**

Hypothetically,there are two scenarios for Digital Therapeutics, which optionwould you prefer?(The participant choose the option A)

|  | **Option A** | **Option B** |
| --- | --- | --- |
| **Medical device** | Computer(based-web) | Mobile application(tablet、phone) |
| **Operation steps** | 3 steps or less | 7 steps or more |
| **Training methods** | Neuromodulation technology | Neuromodulation technology |
| **Therapy location** | At home | At hospital |
| **Therapy frequency** | 6 times a week | 4 times a week |
| **Therapy duration** | 60 minutes or more | 40~60 minutes |
| **The monthly cost of treatment** | ￥12500 | ￥2500 |
| **The monthly cost of treatment** | At home | At home |
| **Which one do you**  **prefer?** | 🗹 | 🞎 |

**III. Choice Set**

Hypothetically,there are two scenarios for Digital Therapeutics, which optionwould you prefer?(please check the box below)

**First group:**

|  | **Option A** | **Option B** |
| --- | --- | --- |
| **Medical device** | Others(virtual reality、vrain-Machine Interface） | Others(virtual reality、vrain-Machine Interface） |
| **Operation steps** | 7 steps or more | 4~6 steps |
| **Training methods** | Conventional cognitive training | Sports training |
| **Therapy location** | At hospital | At home |
| **Therapy frequency** | 6 times a week | 6 times a week |
| **Therapy duration** | 20~40 minutes | 60 minutes or more |
| **The monthly cost of treatment** | ￥12500 | ￥12500 |
| **The monthly cost of treatment** | At home | At hospital |
| **Which one do you**  **prefer?** | 🞎 | 🞎 |

**Second group:**

|  | **Option A** | **Option B** |
| --- | --- | --- |
| **Medical device** | Others(virtual reality、vrain-Machine Interface） | Others(virtual reality、vrain-Machine Interface） |
| **Operation steps** | 7 steps or more | 4~6 steps |
| **Training methods** | Sports training | Neuromodulation technology |
| **Therapy location** | At home | At home |
| **Therapy frequency** | 4 times a week | 4 times a week |
| **Therapy duration** | 20 minutes or less | 40~60 minutes |
| **The monthly cost of treatment** | ￥2500 | ￥12500 |
| **The monthly cost of treatment** | At hospital | At home |
| **Which one do you**  **prefer?** | 🞎 | 🞎 |

**Third group:**

|  | **Option A** | **Option B** |
| --- | --- | --- |
| **Medical device** | Computer(based-web) | Computer(based-web) |
| **Operation steps** | 3 steps or less | 4~6 steps |
| **Training methods** | Conventional cognitive training | Sports training |
| **Therapy location** | At home | At hospital |
| **Therapy frequency** | 4 times a week | 6 times a week |
| **Therapy duration** | 20 minutes or less | 20 minutes or less |
| **The monthly cost of treatment** | ￥12500 | ￥500 |
| **The monthly cost of treatment** | At hospital | At home |
| **Which one do you**  **prefer?** | 🞎 | 🞎 |

**Forth group:**

|  | **Option A** | **Option B** |
| --- | --- | --- |
| **Medical device** | Others(virtual reality、vrain-Machine Interface） | Others(virtual reality、vrain-Machine Interface） |
| **Operation steps** | 7 steps or more | 4~6 steps |
| **Training methods** | Neuromodulation technology | Sports training |
| **Therapy location** | At hospital | At home |
| **Therapy frequency** | 2 times a week | 4 times a week |
| **Therapy duration** | 20~40 minutes | 20~40 minutes |
| **The monthly cost of treatment** | ￥500 | ￥2500 |
| **The monthly cost of treatment** | At hospital | At home |
| **Which one do you**  **prefer?** | 🞎 | 🞎 |

**Fifth group:**

|  | **Option A** | **Option B** |
| --- | --- | --- |
| **Medical device** | Mobile application(tablet、phone) | Others(virtual reality、vrain-Machine Interface） |
| **Operation steps** | 4~6 steps | 4~6 steps |
| **Training methods** | Conventional cognitive training | Conventional cognitive training |
| **Therapy location** | At home | At hospital |
| **Therapy frequency** | 2 times a week | 4 times a week |
| **Therapy duration** | 60 minutes or more | 60 minutes or more |
| **The monthly cost of treatment** | ￥12500 | ￥500 |
| **The monthly cost of treatment** | At hospital | At home |
| **Which one do you**  **prefer?** | 🞎 | 🞎 |

**Sixth group:**

|  | **Option A** | **Option B** |
| --- | --- | --- |
| **Medical device** | Mobile application(tablet、phone) | Mobile application(tablet、phone) |
| **Operation steps** | 4~6 steps | 4~6 steps |
| **Training methods** | Conventional cognitive training | Neuromodulation technology |
| **Therapy location** | At home | At hospital |
| **Therapy frequency** | 6 times a week | 2 times a week |
| **Therapy duration** | 20~40 minutes | 20 minutes or less |
| **The monthly cost of treatment** | ￥2500 | ￥500 |
| **The monthly cost of treatment** | At hospital | At home |
| **Which one do you**  **prefer?** | 🞎 | 🞎 |
